# Supplementary material for: Experimental identification and computational characterization of a novel extracellular metalloproteinase produced by Clostridium sordellii
Source: Royal Society of Chemistry journal article supplement (doi:10.1039/c6ra27654g), 2017-01-01
Supplement: c6ra27654g1.pdf [file c6ra27654g1.pdf]

## Supplementary Information

### Experimental Identification and Computational Characterization of a Novel Extracellular Metalloproteinase Produced by *Clostridium sordellii*

Michael J. Aldape<sup>1,2,\*</sup>; Aoxiang Tao<sup>3</sup>; Dustin D. Heeney<sup>1</sup>; Eric R. McIndoo<sup>1</sup>; John M. French<sup>1</sup>;  
Dong Xu<sup>3,\*</sup>

<sup>1</sup>Veterans Affairs Medical Center, Boise, ID, 83702, USA; <sup>2</sup>Northwest Nazarene University, Nampa, ID, 83686, USA; <sup>3</sup> Department of Biomedical and Pharmaceutical Sciences, College of Pharmacy, Idaho State University, Meridian, ID, 83642, USA

\*Co-Corresponding authors:

- Michael John Aldape, Veterans Affairs Medical Center, Research and Development, Infectious Diseases Section, 500 West Fort St. (Bldg 117), Boise, ID 83702. Phone: 208-422-1000 x7659; Fax: 208-422-1425; e-mail: mike.aldape@va.gov
- Dong Xu, Department of Biomedical and Pharmaceutical Sciences, College of Pharmacy, Idaho State University, Meridian, ID, 83642. Phone: 208-373-1832; Fax: 208-373-1834; e-mail: dxu@pharmacy.isu.edu

**Supplementary Figures:**

Figure S1:

(A)

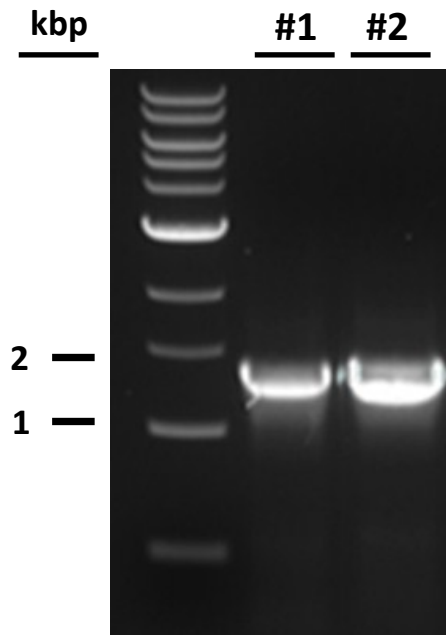

(B)

| Strain    | Locus Tag     | ORF length (kb pairs) |
|-----------|---------------|-----------------------|
| ATCC 9714 | 9714_00259    | 1,538                 |
| 630       | JGS6382_01930 | 1,538                 |
| UMC 164   | UMC_00586     | 1,538                 |
| DA-108    | DA108_00265   | 1,538                 |

Figure S2:

**(A)**

atgattaaaaaaaaatatagcaattttaacagtagcaggattaactctcagtttctagcaccttcagtaagttatgcagatagtcaacaaaagaa  
gattaccacaagcatataatgttaaatcagaaaaagattaaaggatgtttgaaaaatgtatcagatgaatataataaaaaagaactgat  
caatatcaattagttgatacagaaaaagacgatttaggatttactcattatactttaaaccctaaagctgatggctatgttctgaagcagcagaa  
gttaaaagtacatactgataagctcggcaaagttgtctttgtaaattggagatttagatcaaggtaaattggaagttaaaaatcaactaaaatagat  
aaagataaagctattgaattagcttttaaagcaatagaaaaatcacgtgacgaagttaaaaattatcaggtaaagatgtgtacaagaagctaa  
aatagccgtagatgagcaaagtaatagagcaatttatagcttagacatagcgtatactgtaccagagccagctcattggaatattaagttagat  
gcagaaaatggaaatataattgaaaaacaaaatattatagaaaaatgcagctcaaacacaggaactggaataggtgccaatggacaagtta  
aatcacctttaaataacagaagatggaggaaagttctatttattagatactactcataaagggaaaatagctactatagcttttgaggcattg  
atgataatggtatagtaggaagtgtatatctaataataaaaaattgtttgatgggtgaaaagataaagcagccgtagatgctcactactttacag  
ataaagttataaatattataaagatgttcataatagagaaagttagtgacaaaggatcagatatatactcttatgtacatgtaccaaatccaga  
tacaggtgaaagttggagtaagctgcttggactggagcagagatgatttatggagatggtaatacaagttgaagaaaattctttcagcagca  
gatgatgttgtgctcatgaaattacacatggagttacatcatcaacagctaatttagttataagtatcaaccaggagctttaaataaatcttttc  
agatgtatttgatactttgtagatagtgatgattggacaatgggtgaaagatttatataaacacctaatacagctataagagatttaaaagaacc  
taaaaaatataatcaaccagaacatatgaatgaatataaaaaattatagataaattatgatagaggtggagttcatataaatagtggtattcctaa  
caaagcagcatataacactataactaaattaggaaaagaaaagctgaaaaaatttactatagagcttactaaatattaacaagacaatca  
gacttctcagatgctagtcatttaactcaatcagcaaaagatctttatggagataaagaagctaataatgttcaagctgcatggaatgaggt  
tggagtaaattaa

**(B)**

MIKKNIAILTVAGLTL SFLAPSVSYADSQTKEDLPQAYNVKSEKDLKDVLKNVSDEYN  
IKKNTDQYQLVDTEKDDLGFTHYTLKPKADGYFAEAAEVKVHTDKSGKVVFVNGDLD  
QGKLEVKNQTKIDKDKAIELAFKAIEKSRDEVKNLSGKDVVQEAKIAVDEQSNRAIYSL  
DIA YTVPEPAHWNIKLDAENGNIEKQNIENAAQTTGTGIGANGQVKSPLNITEDGGKIFY  
LLDTTHKGKIA TIAFEAFDDNGIVGSVISNIKNCFDGEKDKA AVDAHYFTDKVYKYYKD  
VHNRESYDDKGS DIYSYVHVPNPDTGESWSNAAWTGAEMIYGDGNQVEENSFSAADD  
VVAHEITHGVTSS TANLVYKYQPGALNESFSDFVGYFVDSDDWTMGEDLYKTPNTAIR  
DLKEPKKYNQPEHMNEYKNYSINYDRGGVHINS GIPNKAAYNTITKLGKEKAEKIYYRA  
LTKYLTRQSDFS DASHALTQSAKDLYGDKEANDVQAAWNEVGVN

Figure S3.

(A)

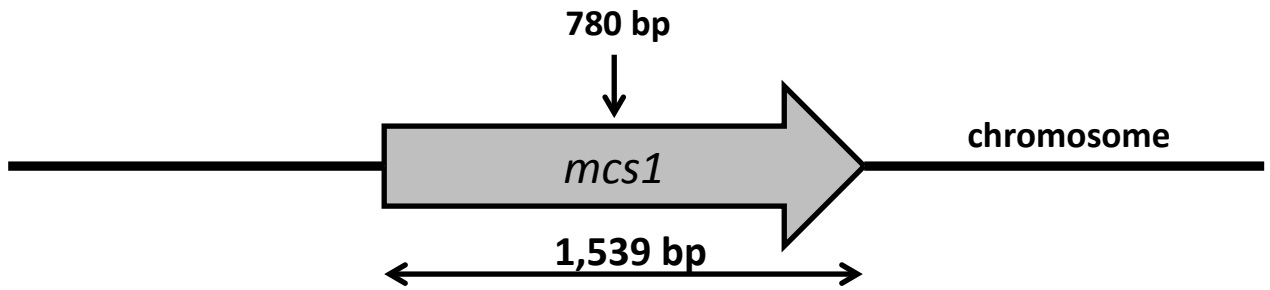

(B)

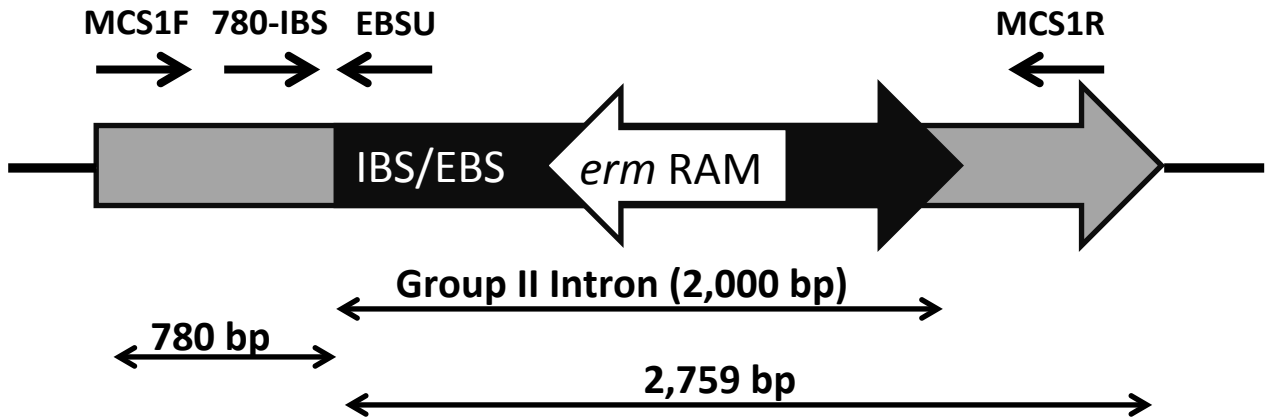

(C)

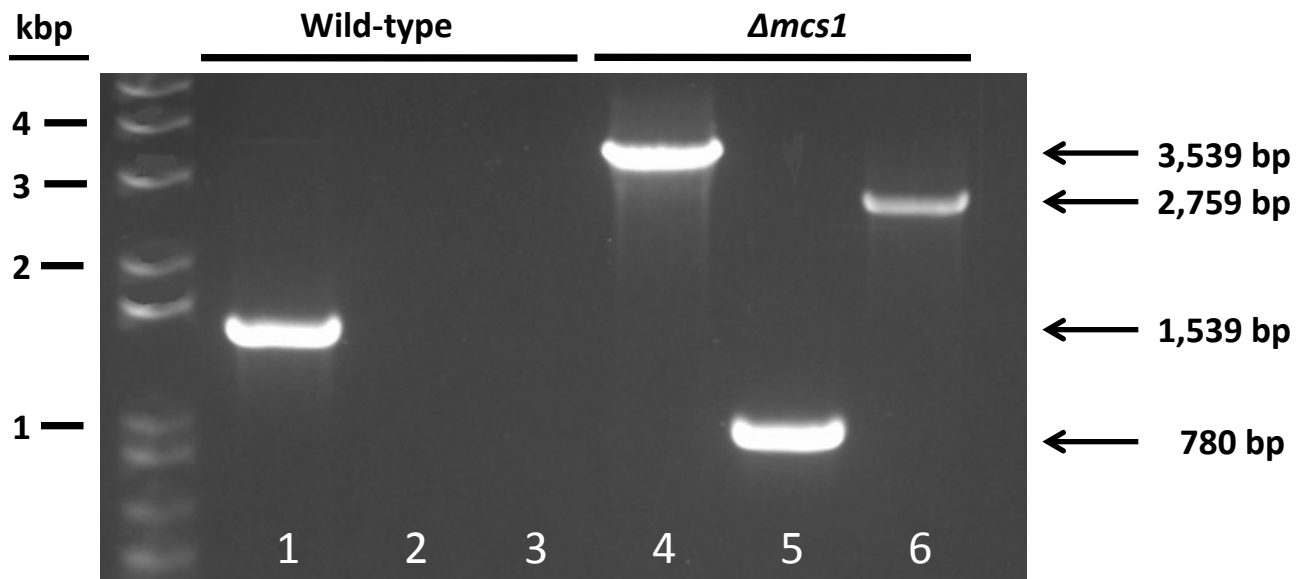

(D)

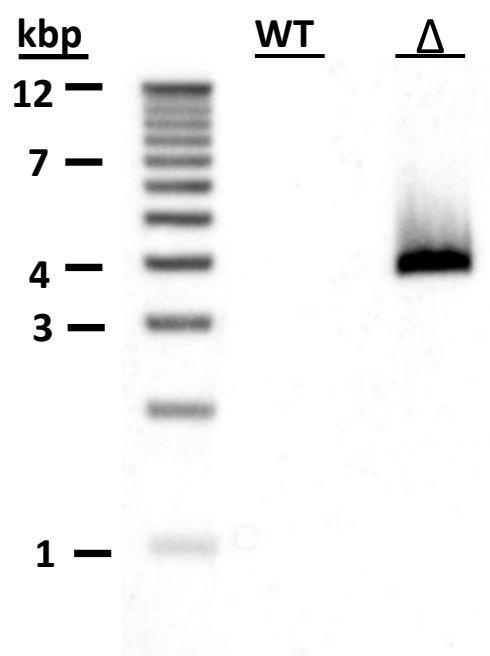

## Supplementary Figure Legends:

### **Figure S1. Identification of the Mcs1 open reading frame in multiple *C. sordellii* strains.**

The Mcs1 open reading frame was identified in A) in 2 out of 2 additional clinical isolates using PCR analysis, and B) 3 out of 3 *C. sordellii* strains following annotated whole genome sequence examination.

### **Figure S2. Nucleotide and protein sequences of the *C. sordellii* protease Mcs1. A)**

Nucleotide sequence of the Mcs1 (ORF\_00259) open reading frame. B) The deduced amino acid sequence of the pro-peptide of Mcs1. The 512-aa peptide contains a 26 amino acid leader sequence (bolded and underlined in black) and the highly conserved zinc-binding motif sequence HEXXH (bolded and underlined in red).

**Figure S3. Screening a *C. sordellii* *mcs1* mutant candidate by PCR.** A and B) Schematic representation of A) wild-type and B) mutated *mcs1* open reading frame. The ClosTron insertion site is depicted by the vertical arrow at the base pair 780. The locations of *mcs1* specific primers, MCS1F and MCS1R, and intron specific primers, 780-IBS and EBSU, are shown with horizontal arrows on either side of the *mcs1* gene and ClosTron insertion site, respectively. The sizes of the PCR products are indicated. C) PCR products of the wild-type (Lanes 1 to 3) and *mcs1* mutant (Lanes 4 to 6) strains. Lanes 1 and 3; primer pair MCS1F and MCS1R. Lanes 2 and 5; primer pair MCS1F and EBS-U. Lanes 3 and 6; primer pair 780-ISB and MCS1R. (D) Southern blot of *mcs1* mutant in *C. sordellii* ATCC 9714. Genomic DNA was harvested from wild-type (Lane 1) and  $\Delta mcs1$  mutant (Lane 2) strains from overnight cultures. Chromosomal preparations were cleaved with *PacI* restriction enzyme, separated on a 0.8% agarose gel and transferred to a nylon

membrane. The membrane was hybridized with a biotinylated DNA probe spanning the *erm* RAM and 3' region of the group II intron.
